# Supplementary material
Source: PubMed Central journal article supplement (PMC6954954)
Supplement: NIHMS1543381-supplement-1.pdf [file NIHMS1543381-supplement-1.pdf]

**Supplementary Table 1: Summary of CTPS2 kinetic parameters**

|                       | UTP kinetics          |                   | CTP inhibition        |                   |
|-----------------------|-----------------------|-------------------|-----------------------|-------------------|
|                       | S <sub>0.5</sub> (μM) | n <sub>Hill</sub> | IC <sub>50</sub> (μM) | n <sub>Hill</sub> |
| CTPS2 (1500 nM)       | 11.7                  | 2.8               | 21.0                  | 8.3               |
| CTPS2-H355A (1500 nM) | 14.0                  | 1.1               | 17.1                  | 3.5               |
| CTPS2 (300 nM)        | -                     | -                 | 19.2                  | 3.9               |
